# Supplementary material for: Thermal imprinting and vapor annealing of interfacial layers for high-performance organic light-emitting diodes
Source: Royal Society of Chemistry journal article supplement (doi:10.1039/c9tc03074c), 2019-01-01
Supplement: c9tc03074c1.pdf [file c9tc03074c1.pdf]

Supporting information

**Thermal Imprinting and Vapor Annealing of Interfacial Layers  
for High-Performance Organic Light-Emitting Diodes**

Mingguang Li,<sup>†</sup> Jun Wang,<sup>†</sup> Ying Zhang, Yizhong Dai, Lingfeng Chen, Chao Zheng,

Wenzhen Lv, Runfeng Chen\* and Wei Huang

<sup>†</sup> These authors contributed equally to this work.

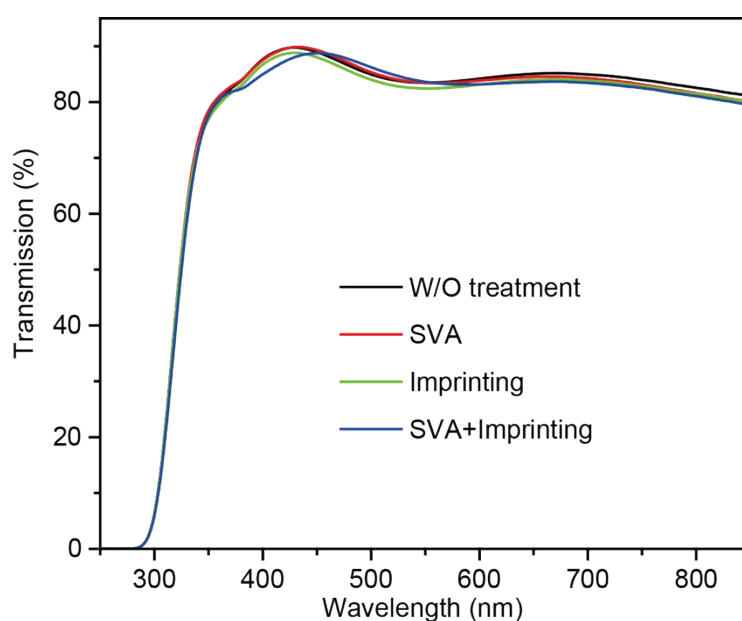

**Figure S1.** Transmission spectra of the PEDOT:PSS layers without and with different post-treatments.

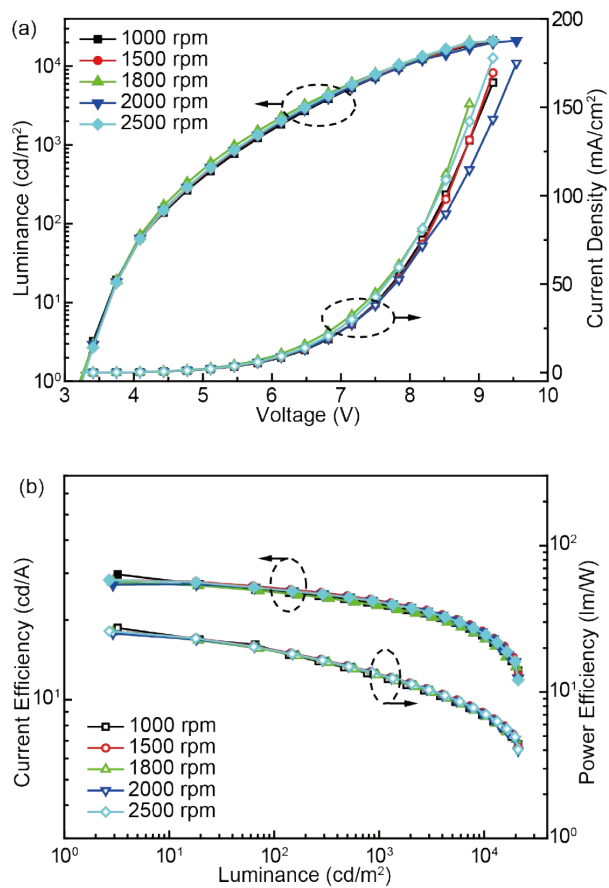

**Figure S2.** (a) Current density/luminance versus voltage ( $J$ - $V$ - $L$ ) characteristics, and (b) current efficiency (CE)/power efficiency (PE) versus luminance characteristics of OLEDs fabricated using PEDOT:PSS layers with different thickness.

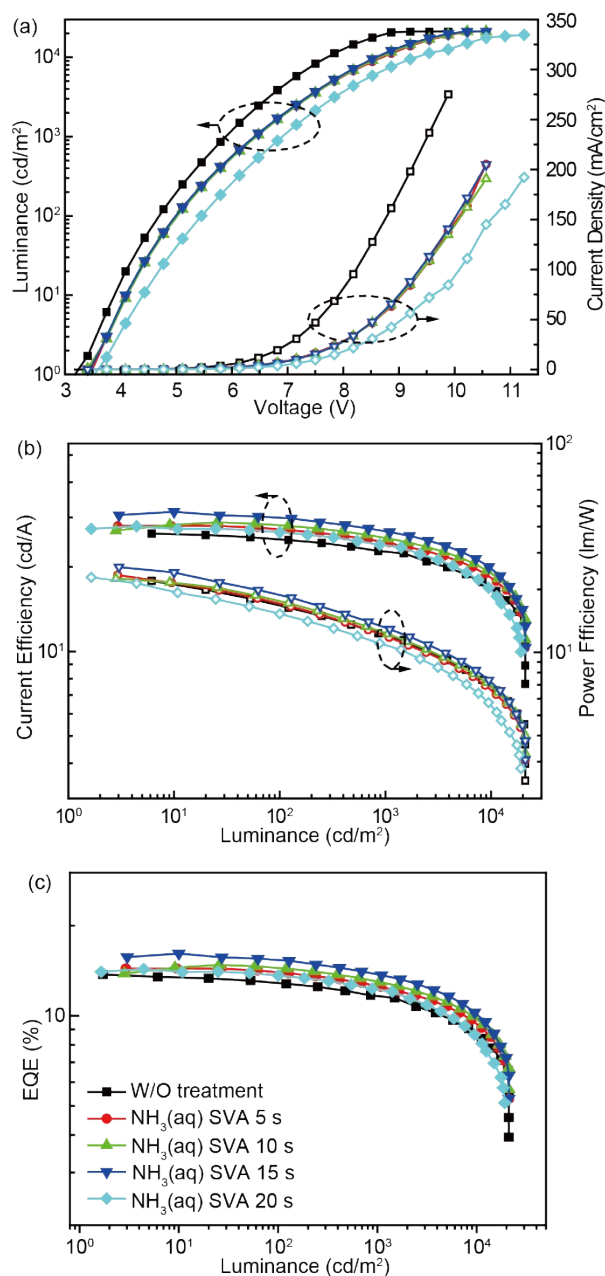

**Figure S3.** (a) Current density/luminance versus voltage ( $J$ - $V$ - $L$ ) characteristics, (b) CE/ PE/EQE versus luminance characteristics of OLEDs fabricated with  $\text{NH}_3(\text{aq})$  SVA-treated PEDOT:PSS layers.

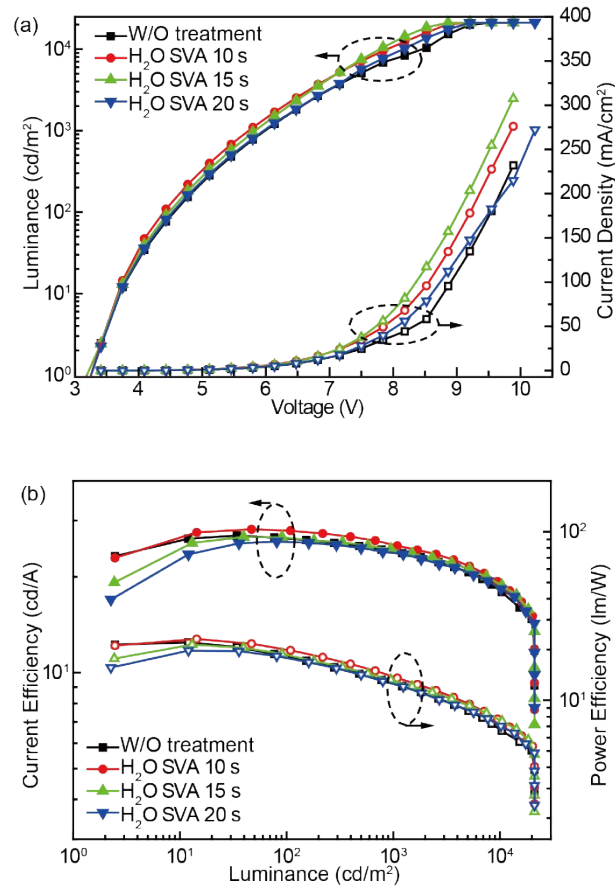

**Figure S4.** (a) Current density/luminance versus voltage (*J-V-L*) characteristics, and (b) CE/PE versus luminance characteristics of OLEDs fabricated with H<sub>2</sub>O SVA-treated PEDOT:PSS layers.

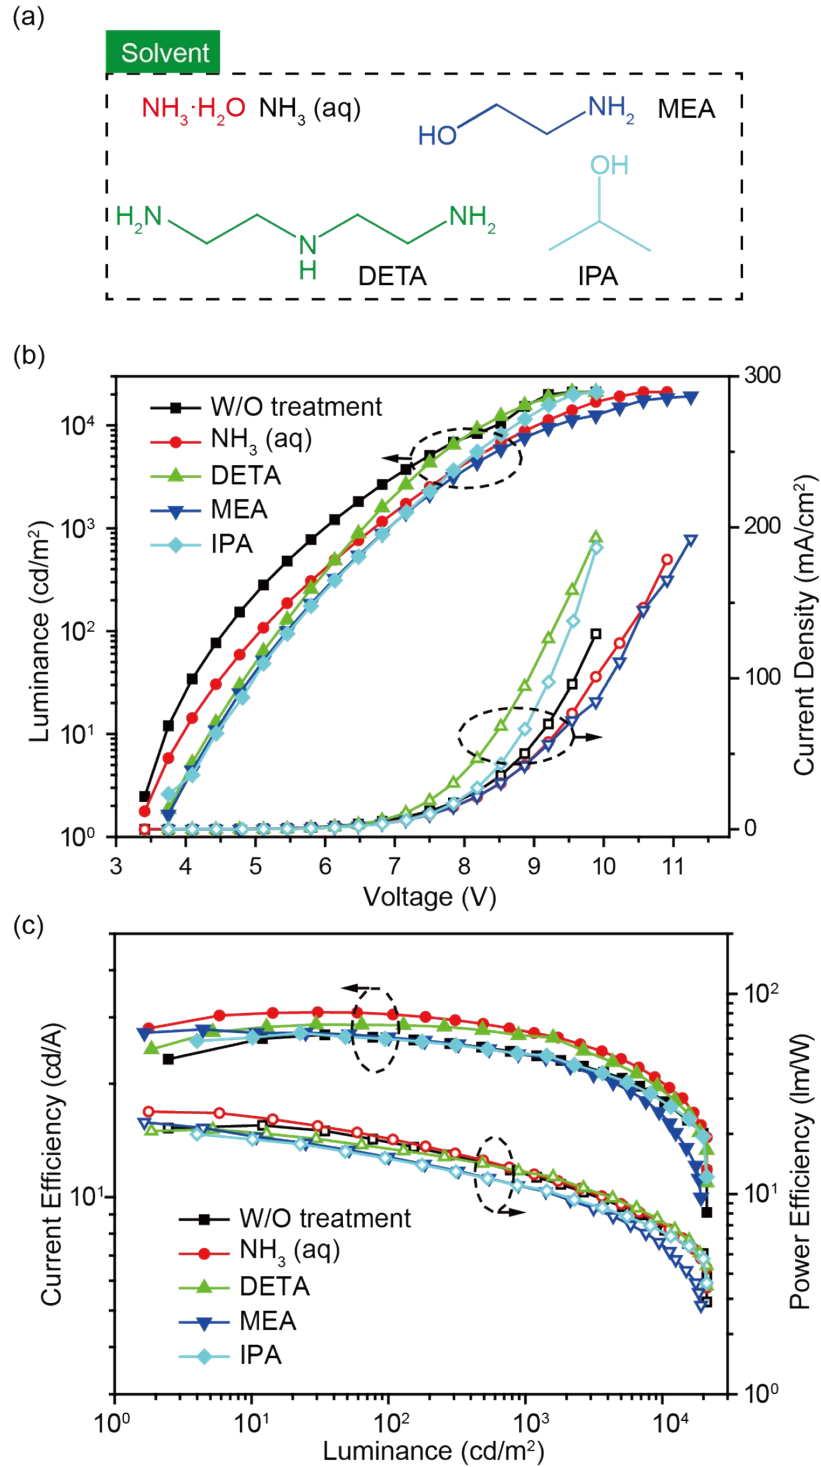

**Figure S5.** (a) Molecular structures of various solvents used for solvent vapor annealing (SVA), (b) Current density-luminance-voltage ( $J$ - $V$ - $L$ ) characteristics and CE/PE versus luminance curves of the PhOLEDs based on different SVA-treated PEDOT:PSS layers.

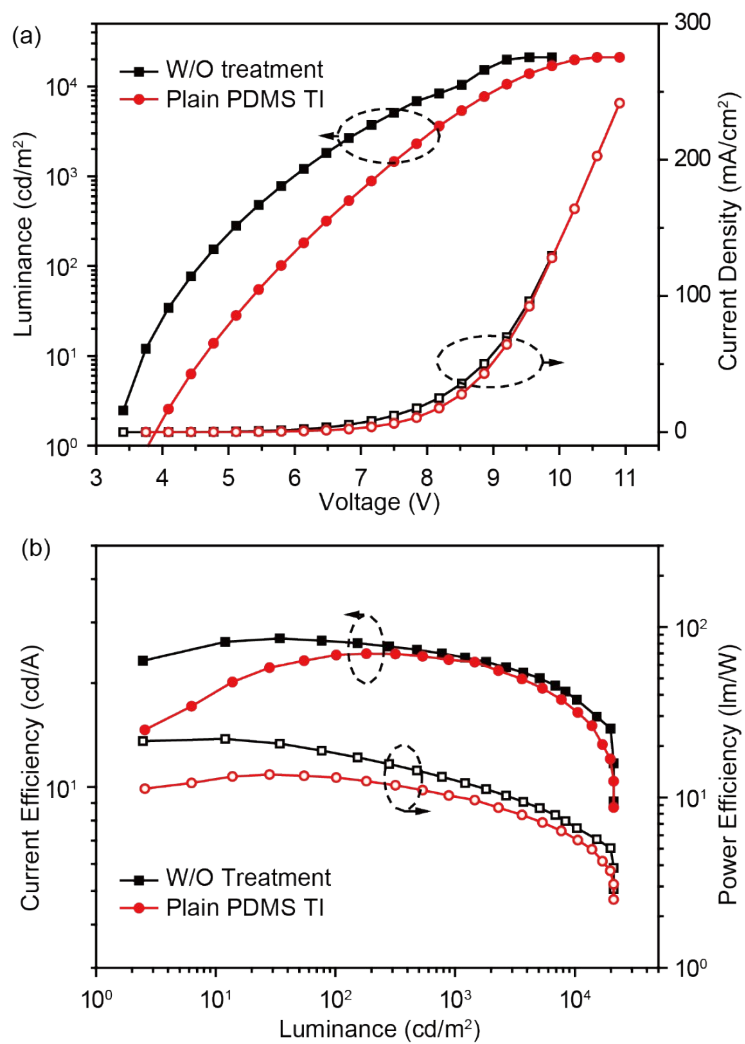

**Figure S6.** (a) Current density-luminance-voltage ( $J-V-L$ ) characteristics and CE/PE versus luminance curves of the PhOLEDs based on pristine and plain PDMS TI-treated PEDOT:PSS layers.

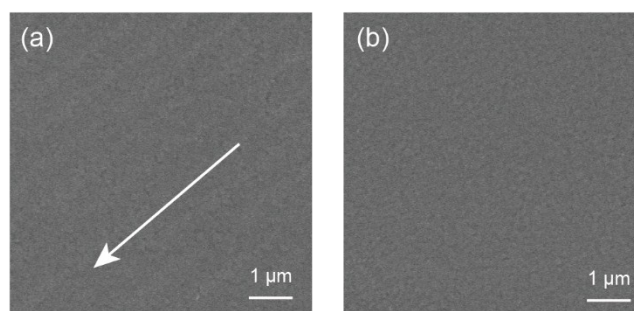

**Figure S7.** SEM images of patterned PEDOT:PSS layers fabricated by imprinting (a) before and (b) after being employed to  $\text{NH}_3$  vapor. The PDMS template has been peeled off during  $\text{NH}_3(\text{aq})$  SVA treatment.

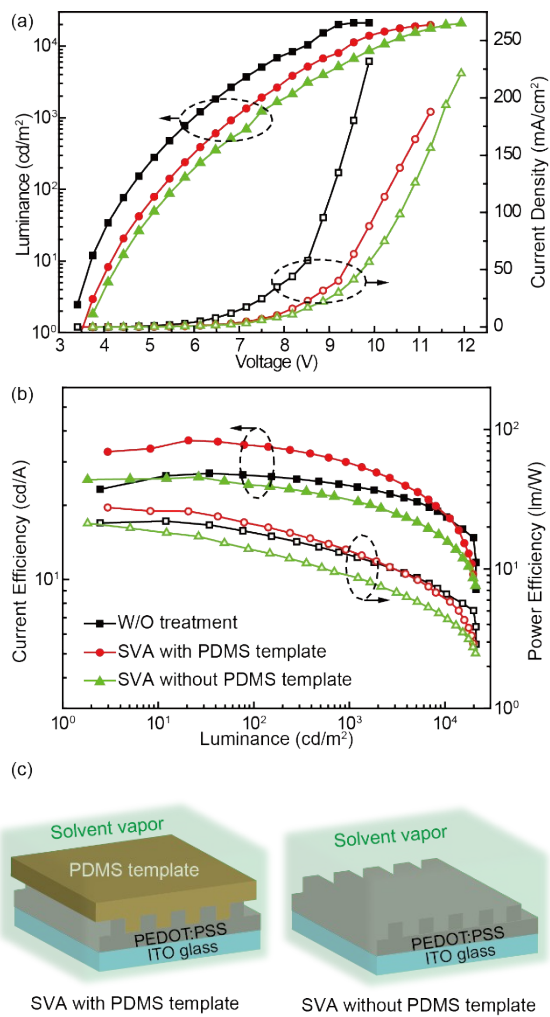

**Figure S8.** (a) Current density/luminance versus voltage ( $J$ - $V$ - $L$ ) characteristics, and (b) CE/PE versus luminance characteristics of OLEDs fabricated with  $\text{NH}_3(\text{aq})$  SVA-treated patterned PEDOT:PSS layers. (c) Schematic diagram of  $\text{NH}_3(\text{aq})$  SVA treatment of PEDOT:PSS layer when the PDMS template is still located on the upper surface or the PDMS template has been removed.

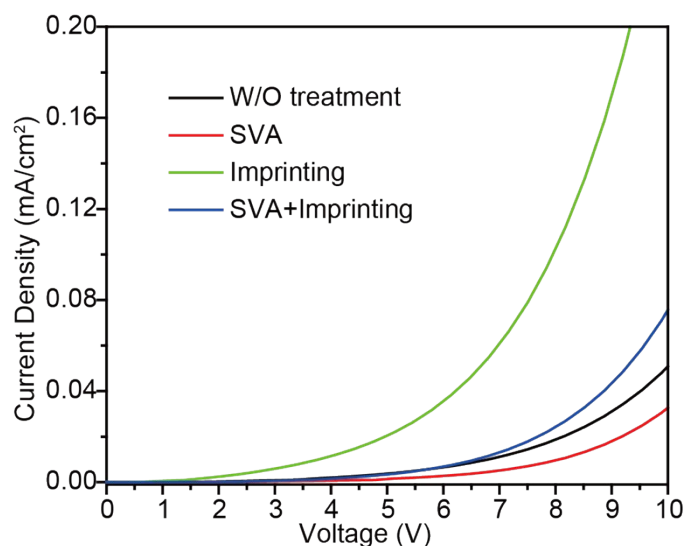

**Figure S9.** Current density versus voltage plot of hole-only device with the structure of ITO/PEDOT:PSS (100 nm)/TAPC(20 nm)/mCP(100 nm)/MoO<sub>3</sub>(10 nm)/Al(100 nm), where the PEDOT:PSS layer was treated under different conditions.

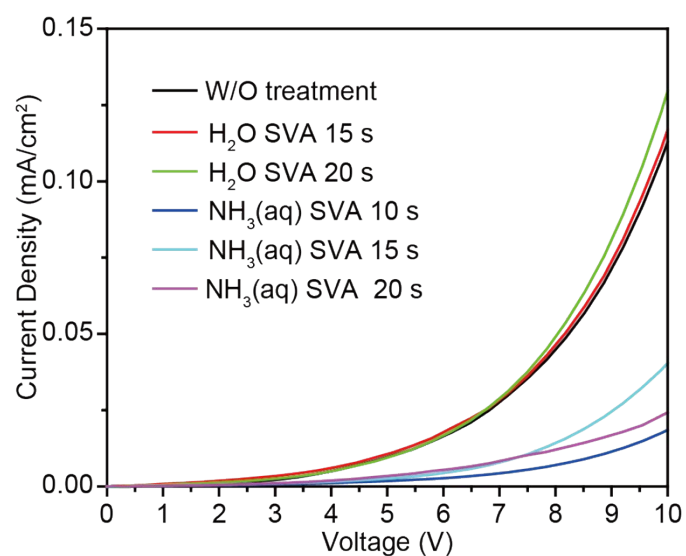

**Figure S10.** Current density versus voltage plot of hole-only device with the structure of ITO/PEDOT:PSS (100 nm)/TAPC(20 nm)/mCP(100 nm)/MoO<sub>3</sub>(10 nm)/Al(100 nm), where the PEDOT:PSS layer was treated by NH<sub>3</sub>(aq) or H<sub>2</sub>O vapor.



**Table S1.** Summary of the device performance for phosphorescent OLEDs fabricated using PEDOT:PSS layers with different preparation conditions.

| Preparation of PEDOT:PSS | $V_{on}(V)$ | Luminance( $cd/m^2$ ) | CE( $cd/A$ ) | PE( $lm/W$ ) |
|--------------------------|-------------|-----------------------|--------------|--------------|
| 1000 rpm, 40 s           | 3.23        | 21116                 | 29.73        | 27.38        |
| 1500 rpm, 40 s           | 3.23        | 21125                 | 28.28        | 26.05        |
| 1800 rpm, 40 s           | 3.23        | 20250                 | 27.87        | 25.67        |
| 2000 rpm, 40 s           | 3.14        | 21126                 | 27.30        | 25.06        |
| 2500 rpm, 40 s           | 3.23        | 21127                 | 28.30        | 26.07        |

**Table S2.** Summary of the device performance for phosphorescent OLEDs fabricated with  $NH_3(aq)$  SVA-treated PEDOT:PSS layers.

| SVA treatment       | $V_{on}(V)$ | Luminance( $cd/m^2$ ) | CE( $cd/A$ ) | PE( $lm/W$ ) | EQE(%) |
|---------------------|-------------|-----------------------|--------------|--------------|--------|
| W/O treatment       | 3.17        | 21093                 | 26.26        | 21.98        | 13.73  |
| $NH_3(aq)$ SVA 5 s  | 3.45        | 21109                 | 28.00        | 23.45        | 14.38  |
| $NH_3(aq)$ SVA 10 s | 3.38        | 21108                 | 28.78        | 22.55        | 14.79  |
| $NH_3(aq)$ SVA 15 s | 3.40        | 21112                 | 31.41        | 25.58        | 16.13  |
| $NH_3(aq)$ SVA 20 s | 3.53        | 19177                 | 27.87        | 22.86        | 14.31  |

**Table S3.** Summary of the device performance for phosphorescent OLEDs fabricated with  $H_2O$  SVA-treated PEDOT:PSS layers.

| SVA treatment   | $V_{on}(V)$ | Luminance( $cd/m^2$ ) | CE( $cd/A$ ) | PE( $lm/W$ ) |
|-----------------|-------------|-----------------------|--------------|--------------|
| W/O treatment   | 3.25        | 21135                 | 26.95        | 22.05        |
| $H_2O$ SVA 10 s | 3.25        | 21137                 | 28.20        | 23.09        |
| $H_2O$ SVA 15 s | 3.20        | 21141                 | 26.67        | 21.38        |
| $H_2O$ SVA 20 s | 3.25        | 21144                 | 25.79        | 19.70        |

**Table S4.** Summary of the device performance for phosphorescent OLEDs fabricated with different SVA-treated PEDOT:PSS layers.

| Vapor Type        | $V_{on}(V)$ | Luminance ( $cd/m^2$ ) | CE ( $cd/A$ ) | PE ( $lm/W$ ) |
|-------------------|-------------|------------------------|---------------|---------------|
| W/O treatment     | 3.27        | 21135                  | 26.95         | 22.05         |
| $NH_3 \cdot H_2O$ | 3.59        | 21100                  | 30.66         | 21.61         |
| DETA              | 3.56        | 21095                  | 28.71         | 21.05         |
| MEA               | 3.55        | 19960                  | 27.87         | 22.86         |
| IPA               | 3.56        | 21094                  | 27.25         | 19.91         |

**Table S5.** Summary of the device performance for phosphorescent OLEDs fabricated with  $\text{NH}_3(\text{aq})$  SVA-treated sub-micron patterned PEDOT:PSS layers.

| <b>SVA treatment</b>      | <b><math>V_{\text{on}}(\text{V})</math></b> | <b>Luminance(<math>\text{cd}/\text{m}^2</math>)</b> | <b>CE(<math>\text{cd}/\text{A}</math>)</b> | <b>PE(<math>\text{lm}/\text{W}</math>)</b> |
|---------------------------|---------------------------------------------|-----------------------------------------------------|--------------------------------------------|--------------------------------------------|
| W/O treatment             | 3.25                                        | 21135                                               | 26.95                                      | 22.05                                      |
| SVA with PDMS template    | 3.48                                        | 19721                                               | 36.62                                      | 27.60                                      |
| SVA without PDMS template | 3.66                                        | 20876                                               | 26.00                                      | 21.38                                      |
